# Supplementary material
Source: Research Square preprint supplement (doi:10.21203/rs.3.rs-9167723/v1)
Supplement: Supplementary file 1 [file 0793b61aa2c4e30e3f73369a.xlsx]

## Sheet: Sheet1
Supplementary Table 2: Results of competitive mapping using a dataset including 47 chordopoxvirus genomes representing all potential distinct species/evolutionary entities for which a genome was deposited in public databases.
Specimen	Total unique reads	Best match			Second best match
		Reference genome	Unique reads	Unique reads	Reference genome	Unique reads	Unique reads
				proportion			proportion
DRC Kole Weyns's duiker	5287	OZ287284	5104	0.965	PV920573	50	0.009
		Orthopoxvirus monkeypox			Orthopoxvirus camelpox
DRC Kikwit common duiker	43945	NC_008291	30883	0.703	PV920573	7957	0.181
		Orthopoxvirus taterapox			Orthopoxvirus camelpox
Côte d'Ivoire TNP Maxwell's duiker	50655	OZ287284	42439	0.838	NC 055231	4601	0.091
		Orthopoxvirus monkeypox			Orthopoxvirus abatinomacacapox
