# Supplementary material
Source: Research Square preprint supplement (doi:10.21203/rs.3.rs-9167723/v1)
Supplement: Supplementary file 2 [file 221c25790b594e3894ceb719.docx]

**Title**

Duikers are infected with orthopoxviruses

**Authors**

Kamilla Pléh1,2*, Jasmin Schlotterbeck1*, Harriet R. Herridge1*, Christelle Patricia Lumbu3, Carme Riutord-Fe1,2, Giovanna Miani1,2, Ane López-Morales2, Menard-Mbende Longwango4, Papy-Lolatui Ngongo4, Arsène Yenamau4, Leonce Kouadio2,5, Terence Fuh Neba6, Yvonne Ukamaka Ajamma¹, Martin Beer7, Dominic Bläsing¹, Angele Breithaupt8, Tomke Bütow¹, Khaled Ferchichi¹, Tobias Gräßle¹, Donata Hoffmann7, Moritz J. S. Jochum¹, Aline Maksimov¹, David Morgan9,10, Caroline Röthemeier1, Crickette Sanz11, Roman Wittig2, Cathy Crockford2, Liran Samuni2,12,13, Livia Victoria Patrono1, Steve Ahuka Mundeke3, William-Georges Crosmary6, Sébastien Calvignac-Spencer1,14, Jan F. Gogarten1,14*, Ariane Düx1,2*§, Fabian H. Leendertz1,2,14,15*§

*These authors contributed equally

§Corresponding authors

**Affiliations**

1 Helmholtz Institute for One Health (HIOH), Helmholtz Centre for Infection Research (HZI), Greifswald, Germany

2 Taï Chimpanzee Project, Centre Suisse de Recherches Scientifiques en Côte d’Ivoire (CSRS), Abidjan, Côte d’Ivoire

3 Institut Nationale de Recherche Biomédicale, Kinshasa, Democratic Republic of the Congo

4 World Wide Fund for Nature (WWF) DRC, Kinshasa, Democratic Republic of the Congo

5 Université Peleforo Gon Coulibaly Korhogo, Korhogo, Côte d’Ivoire

6 World Wide Fund for Nature (WWF) Germany, Berlin, Germany

7 Institute of Diagnostic Virology, Friedrich-Loeffler-Institut, Greifswald-Insel Riems, Germany

8 Department of Experimental Animal Facilities and Biorisk Management, Friedrich-Loeffler-Institut, Greifswald-Insel Riems, Germany

9 Goualougo Triangle Ape Project, Noubale-Ndoki National Park, Bomassa, Republic of the Congo

10 Fisher Center for the Study and Conservation of Apes, Lincoln Park Zoo, 2001 North Clark Street, Chicago, USA

11 Department of Anthropology, Washington University in St. Louis, 1 Brookings Dr, St. Louis, MO 63130, United States of America

12 Cooperative Evolution Lab, German Primate Center, Göttingen, Germany

13Department of Human Origins, Max Planck Institute for Evolutionary Anthropology, Leipzig, Germany

14 University of Greifswald, Greifswald, Germany

15 Robert Koch-Institut, Berlin, Germany

*These authors contributed equally to this work

§Correspondence: ariane.duex@helmholtz-hioh.de and [fabian.leendertz@helmholtz-hioh.de](mailto:fabian.leendertz@helmholtz-hioh.de).

**Supplementary Information**

**Table of contents**

**Supplementary Tables**

**Supplementary Videos**

**Supplementary Discussion**

Chimpanzee duiker interactions

N230505 TNP duiker necropsy report

Additional discussion on duiker diets

Additional discussion on diets of other mammalian herbivores

**Supplementary Figures**

Supplementary Fig. 1: Swelling of mesenteric lymph node

Supplementary Fig. 2: Histopathology of mesenteric lymph node

**Supplementary Tables**

**Supplementary Tables 1, 2, 3, 4, 5, 6, 7, 8, 9, 10 and 11.** These Excel files contain details regarding the samples collected, results of the analyses conducted on these samples and relevant further background information. **Supplementary Table 1** provides information on the bushmeat samples collected from markets in DRC and the subsequent analyses. The data presented include details on the samples examined as well as species identification and orthopoxvirus (OPV) qPCR results. **Supplementary Table 2** provides the results of competitive mapping using a dataset including 47 chordopoxvirus genomes, representing all potential distinct species/evolutionary entities for which a genome was deposited in public databases. **Supplementary Table 3** provides information on all duiker necropsy samples that were collected in Taï National Park (TNP), Côte d’Ivoire, and analysed in this study. The data presented include details on the tissues examined as well as the results on OPV qPCR, monkeypox virus (MPXV) qPCR, whole genome sequencing, and virus isolation. **Supplementary Table 4** contains a summary of literature evidence of duiker scavenging. **Supplementary Table 5** contains information about duiker pellets and non-duiker mammal species detections from the duiker diet metabarcoding analysis. **Supplementary Table 6** contains the results from the duiker diet metabarcoding analysis, showing the number of reads from non-duiker species remaining after filtering. **Supplementary Table 7** contains a summary of camera trap observations of animals seen at carcasses in TNP and Dzanga Sangha Protected Areas (DSPA), Central African Republic. **Supplementary Table 8** provides additional information regarding the OPV positive bushmeat samples from the Democratic Republic of the Congo (DRC) and details of whole genome sequencing and virus isolation. **Supplementary Table 9** provides information on the accession numbers used for Orthopoxvirus bait design. **Supplementary Table 10** provides a summary of downsampling of duiker pellets for ensuring independent scavenging events. **Supplementary Table 11** contains an overview of examples of scavenging behaviour by herbivores observed in the literature.

**Supplementary Videos**

**Supplementary Video 1.** Shows a yellow-backed duiker from DSPA lifting and moving an agile mangabey (*Cercocebus agilis*) carcass.

**Supplementary Video 2.** Shows a yellow-backed duiker from DSPA feeding on an agile mangabey carcass.

**Supplementary Video 3.** Shows a duiker from TNP feeding on the carcass of a black and white colobus (*Colobus polykomos*).

**Supplementary Discussion**

**Chimpanzee duiker interactions**

While the Taï chimpanzees almost exclusively hunt and consume monkey species1, they also regularly interact with ungulates and rodents. These interactions primarily occur when chimpanzees encounter animal carcasses, during which they exhibit a range of fearful and exploratory reactions, including alarm calling, visual inspection, touching, and occasionally biting. Between 2017 and 2024, the Taï chimpanzees were observed interacting with at least 12 duiker carcasses at different stages of decomposition.

On other occasions, chimpanzees have been observed capturing live duikers, which they typically kill but do not consume (14 observed cases between 2017 and 2025, only one of which resulted in consumption). Since the onset of the Taï Chimpanzee Project in 1979, we have directly observed only three instances of duiker consumption, two of which occurred in the North community. This is likely an underestimate of the true frequency, as duiker hunting is inherently less conspicuous than monkey hunting, which is typically very noisy and attracts additional individuals to the area. In line with this, the case of duiker consumption in a North chimpanzee associated with the MPXV outbreak was detected only via duiker DNA in fecal metabarcoding, without any corresponding feeding observation, highlighting the contribution of metabarcoding to revealing rare consumption cases.

**N230505 TNP duiker necropsy report**

A duiker carcass of unknown sex and age was found in TNP on May 5th 2023. The necropsy was performed by field veterinarian Carme Riutord-Fe and assisted by PhD student Jasmin Schlotterbeck on the same day from 16:00 to 17:00.

Location: East territory, at around 200m North from Layon Nicolas and 2km South-East from East camp. Carcass found at the following coordinates (UTM): 29N 0691436 0644287

History: The carcass was found by a field assistant and a PhD student at 10:00, while following the chimpanzees from the East community. They reported that they saw the half lower part of a Maxwell’s duiker and that some of the chimpanzees interacted with it. Dijon (adult female) approached it to 1-2m, Paddy (juvenile male) and Richelieu (adult male) sniffed it and Ivoire (adult male) dragged it around 5m and tried to break the legs with no success. After 2-3 minutes, the chimpanzees left the carcass behind.

Examination: Once the field veterinarian and assistant arrived at the necropsy site, only grey fur, some bones surrounded by a small amount of muscle, and the gastro-intestinal tract could be found. Some maggots were present around the intestines and many flies around all the body parts. The different parts of the body were spread in a radius of ~10m. Some bird bones were also found in the beforementioned radius, together with bird feces. The mesenteric lymph nodes seemed to be enlarged (Supplementary Fig. 1).

Comments: According to the state of the gastro-intestinal organs, the abundance of flies around the body parts and the lack of smell, the body was classified as relatively fresh with an estimated post mortem interval of 8 to 10 hours. Although the condition of the carcass when discovered by the chimpanzees and presence of bird droppings may indicate that the animal was predated, the enlargement of the mesenteric lymph nodes suggest an underlying disease process, potentially weakening or even causing the death of the duiker, making the observations also compatible with post mortem scavenging.

**Additional discussion on duiker diets**

While duikers are generally considered obligate herbivores—primarily consuming fruits and shifting to leaves, flowers, and fungi when fruit is scarce—anecdotal evidence accumulated over the past century suggests their diet may, at times, be more flexible than previously acknowledged, both in captivity and in the wild, as summarized in Supplementary Table 42,3. The earliest documented case of meat consumption in a wild duiker dates back to 19134, with further reports of similar behaviors throughout the 20th century. Machado noted in 1969, that local communities in Angola believed yellow-backed duikers (*Cephalophus silvicultor*) had a particular taste for the meat of the Bell's hinge-back tortoise5. In Kenya, a duiker was observed preying on an adult helmeted guineafowl6, and guineafowl chicks were identified in duiker stomach contents from Zambia7. In the Democratic Republic of the Congo, stomach content analysis revealed that a bay duiker had consumed a common kusimanse, while various yellow-backed duiker stomachs contained remains of porcupine, pangolin, chameleons, and lizards8,9. These direct observations are now increasingly supported by camera trap footage. In Tanzania, an Abbot’s duiker was filmed consuming a frog10; in Uganda, duikers were filmed feeding repeatedly on guano beneath a bat-inhabited tree11; and our own footage recorded duikers scavenging on two of nine monitored vertebrate carcasses in DSPA, and one out of eight in TNP.

**Additional discussion on diets of other mammalian herbivores**

The scavenging behavior of duikers is also not entirely unexpected in light of mounting examples of animal, and animal by-product consumption among typically herbivorous mammals. White-tailed, roe, red, and fallow deer have been documented engaging in a surprising range of carnivorous behaviors, including preying on bird eggs and nestlings12-14, scavenging fish and small mammals15-17, and even gnawing on human bones18. Similar behaviors were recorded in other ungulates: cattle were observed consuming bird nestlings and even a python19,20, while sheep preyed on seabird chicks21,22, and horses captured and consumed live chicks23,24. Antelope species such as impalas and kudus have been seen consuming live birds and chicks25,26, while giraffes have been documented scavenging on the carcasses of gazelles, elands, and wildebeests27-29. Similarly, hippopotamuses were seen scavenging on a variety of large mammals30, and elephants have been observed predating the nests of weaver birds in Kenya31. Beyond ungulates, porcupines and kangaroos were recorded scavenging32,33, and facultative carnivory was observed in species such as ground squirrels and hares34-36. Collectively, these findings suggest opportunistic supplementation of vertebrate protein may be widespread among mammalian herbivores (See Supplementary Table 11).

**Supplementary Figures**

**Supplementary Figure 1:** Swelling of mesenteric lymph node of MPXV-positive Maxwell’s duiker carcass in TNP.

**
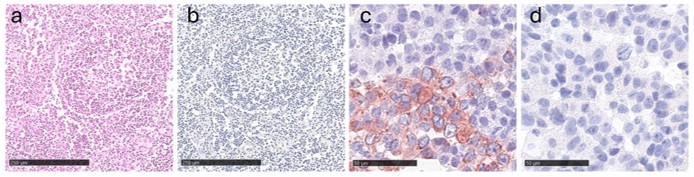
**

**Supplementary Figure 2-**Histopathology of a mesenteric lymph node sample of a MPXV-positive Maxwell’s duiker from TNP showing a reactive follicle (a), but no MPXV antigen (b). As controls, MPXV infected (c) as well as non-infected (d) Vero76 cell pellets are shown. (b-d) Immunohistochemistry using AEC chromogen, counterstained with Mayer’s haematoxylin.  Scale bars 250 μm (a, b) and 50 µm (c, d).

**Supplementary references**

1 Samuni, L., Preis, A., Deschner, T., Crockford, C. & Wittig, R. M. Reward of labor coordination and hunting success in wild chimpanzees. *Communications Biology* **1**, 138 (2018). <https://doi.org:10.1038/s42003-018-0142-3>

2 Hofmann, T. & Roth, H. Feeding preferences of duiker (Cephalophus maxwelli, C. rufilatus, and C. niger) in Ivory Coast and Ghana. *Mammalian Biology* **68**, 65-77 (2003). <https://doi.org:10.1078/1616-5047-00065>

3 Newing, H. *Behavioural ecology of duikers (Cephalophus spp.) in forest and secondary growth, Taï, Côte d'Ivoire* PhD thesis, University of Stirling, (1994).

4 Oertzen, J. v. *In Wildnis und Gefangenschaft : Kameruner Tierstudien*. 43 (Süsserott, 1913).

5 Lumpkin, S. & Kranz, K. R. Cephalophus sylvicultor. *Mammalian Species*, 1-7 (1984). <https://doi.org:10.2307/3503848>

6 Stoneham, H. F. Meat-eating duikers. *Journal of the East Africa Natural History Society* **22**, 205 (1953).

7 Smithers, R. H. N. *The mammals of Botswana*. 203 (National Museum of Rhodesia, 1971).

8 Hart, J. A. *Comparative dietary ecology of a community of frugivorous forest ungulates in Zaire* PhD thesis, Michigan State University, (1985).

9 Kingdon, J. *Volume VI: Hippopotamuses, Pigs, Deer, Giraffe and Bovids*. pages cm (Bloomsbury Publishing 2013).

10 Rovero, F., Jones, T. & Sanderson, J. Notes on Abbott's duiker (Cephalophus spadix True, 1890) and other forest antelopes of Mwanihana Forest, Udzungwa Mountains, Tanzania, as revealed by camera-trapping and direct observations. *Tropical Zoology* **18**, 13-23 (2005). <https://doi.org:10.1080/03946975.2005.10531211>

11 Fedurek, P. *et al.* Selective deforestation and exposure of African wildlife to bat-borne viruses. *Communications Biology* **7**, 470 (2024). <https://doi.org:10.1038/s42003-024-06139-z>

12 Pietz, P. J. & Granfors, D. A. White-tailed Deer (Odocoileus virginianus) Predation on Grassland Songbird Nestlings. *The American Midland Naturalist* **144**, 419-422 (2000). [https://doi.org:10.1674/0003-0031(2000)144[0419:Wtdovp]2.0.Co;2](https://doi.org:10.1674/0003-0031(2000)144%5b0419:Wtdovp%5d2.0.Co;2)

13 Krüger, H., Väänänen, V.-M., Holopainen, S. & Nummi, P. The new faces of nest predation in agricultural landscapes—a wildlife camera survey with artificial nests. *European Journal of Wildlife Research* **64** (2018). <https://doi.org:10.1007/s10344-018-1233-7>

14 Vazquez, M. S., Gonzalez, D. V. & Amico, G. C. Herbivores but not vegans: Deer as nest predators. *Austral Ecology* **48**, 1460-1465 (2023). <https://doi.org:10.1111/aec.13374>

15 Burgess, T. Fish-Eating Deer. *Journal of Mammalogy* **5**, 64-65 (1924). <https://doi.org:10.1093/jmammal/5.1.64-a>

16 Olson, S. F. Fish-Eating Deer. *Journal of Mammalogy* **13**, 80-81 (1932). <https://doi.org:10.1093/jmammal/13.1.80-a>

17 Harry W Squibb & Thurston, B. Carnivorous behavior patterns of deer. *Report of the Committee on Wildlife Diseases, United States Animal Health Association* **112**, 3-4 (2008).

18 Meckel, L. A., McDaneld, C. P. & Wescott, D. J. White-tailed Deer as a Taphonomic Agent: Photographic Evidence of White-tailed Deer Gnawing on Human Bone. *J Forensic Sci* **63**, 292-294 (2018). <https://doi.org:10.1111/1556-4029.13514>

19 Larkins, D. & Prosser, D. Cow caught chewing on a large python in outback northern Australia. *ABC News* (2020). <<https://www.abc.net.au/news/2020-10-28/cow-eating-snake-photos-outback-australia/12822382>>.

20 Nack, J. & Ribic, C. Apparent predation by cattle at grassland bird nests. *Wilson Bulletin - WILSON BULL* **117**, 56-62 (2005). <https://doi.org:10.1676/04-056>

21 Furness, R. W. The predation of Tern chicks by sheep. *Bird Study* **35**, 199-202 (2009). <https://doi.org:10.1080/00063658809476989>

22 Furness, R. W. Predation on ground-nesting seabirds by island populations of red deer Cervus elaphus and sheep Ovis. *Journal of Zoology* **216**, 565-573 (1988). <https://doi.org:10.1111/j.1469-7998.1988.tb02451.x>

23 Martone, G. in *Horse eats Chicken* [*https://www.youtube.com/watch?v=jP6dvgo25Z8&ab_channel=User*](https://www.youtube.com/watch?v=jP6dvgo25Z8&ab_channel=User) (YouTube, 2014).

24 User, Y. in *Horse eats Chicken* [*https://www.youtube.com/watch?v=jP6dvgo25Z8&ab_channel=User*](https://www.youtube.com/watch?v=jP6dvgo25Z8&ab_channel=User) (YouTube, 2020).

25 Reinmar, G. Blauböckchen (Cephalophus monticola [Thunberg, 1798]; Cephalophinae, Bovidae) als Insektenfresser  *Zeitschrift für Säugetierkunde* **35**, 357-359 (1969).

26 Kurt, F. Zur Carnivorie bei Cephalophus dorsalis. *Zeitschrift für Säugetierkunde* **28**, 309-313 (1963).

27 Western, D. Giraffe chewing a Grant's gazelle carcass. *African Journal of Ecology* **9**, 156-157 (1971).

28 Evam, E. M. N. The reaction of a group of Rothschild's giraffe to a new environment. *African Journal of Ecology* **8**, 53-62 (1970). <https://doi.org:10.1111/j.1365-2028.1970.tb00830.x>

29 Hutson, J. M., Burke, C. C. & Haynes, G. Osteophagia and bone modifications by giraffe and other large ungulates. *Journal of Archaeological Science* **40**, 4139-4149 (2013). <https://doi.org:10.1016/j.jas.2013.06.004>

30 Dudley, J. P. *et al.* Carnivory in the common hippopotamus Hippopotamus amphibius: implications for the ecology and epidemiology of anthrax in African landscapes. *Mammal Review* **46**, 191-203 (2015). <https://doi.org:10.1111/mam.12056>

31 BBC News. *Elephants have been caught eating weaver bird nests*, < <https://www.bbc.com/news/av/world-36229348>> (2016).

32 Coppola, F. *et al.* Evidence of scavenging behaviour in crested porcupine. *Scientific Reports* **10**, 12297 (2020). <https://doi.org:10.1038/s41598-020-69252-z>

33 Hlusiak, S. Vol. 2025 (Sascha Hlusiak's Blog, 2014).

34 Boonstra, R., Krebs, C. J. & Kanter, M. Arctic ground squirrel predation on collared lemmings. *Canadian Journal of Zoology* **68**, 757-760 (1990). <https://doi.org:10.1139/z90-109>

35 Peers, M. J. L., Majchrzak, Y. N., Konkolics, S. M., Boonstra, R. & Boutin, S. Scavenging by snowshoe hares (Lepus americanus) in Yukon, Canada. *Northwestern Naturalist* **99**, 232-235 (2018).

36 Bumann, G. B. & Stauffer, D. F. Scavenging of ruffed grouse in the Appalachians: influences and implications. *Wildlife Society Bulletin* **30**, 853-860 (2002).

37 Allan, T. A. Further Evidence of White-Tailed Deer Eating Birds in Mist Nets | Searchable Ornithological Research Archive. *Bird Banding* **49**, 184 (1978).

38 Keyser, A. J. Nest Predation in Fragmented Forests: Landscape Matrix by Distance from Edge Interactions. *The Wilson Bulletin* **114**, 186-191 (2002).

39 Harry W Squibb, B. & Thurston. Carnivorous behavior patterns of deer A preliminary investigation of the use of gut piles and carcasses.pdf. *REPORT OF THE COMMITTEE ON WILDLIFE DISEASES*, 3-4 (2008).

40 Ellis-Felege, S. N. *et al.* Cameras Identify White-tailed Deer Depredating Northern Bobwhite Nests. *Southeastern Naturalist* **7**, 562-564 (2008). <https://doi.org:10.1656/1528-7092-7.3.562>

41 Krapu, G., Granfors, D. & Ribic, C. Vol. 43 3-22 (2012).

42 Furness, R. W. Vol. 216 565-573 (Wiley-Blackwell, London, 1988).

43 Domingo, I. *et al.* Scavenging Behaviour of Red Deer Cervus elaphus Linnaeus, 1758 (Artiodactyla: Cervidae) in Eastern Spain. *Acta Zoologica Bulgarica* **74**, 627-629 (2022).

44 Vazquez, M. S. & Amico, G. C. Nest predation in Patagonian wetlands: predator assemblage and microhabitat characteristics. *Emu - Austral Ornithology* **123**, 24-34 (2023). <https://doi.org:10.1080/01584197.2022.2153700>

45 Larkins, D. a. P., Donny. Cow caught chewing on a large python in outback northern Australia. (2020). <<https://www.abc.net.au/news/2020-10-28/cow-eating-snake-photos-outback-australia/12822382>>.

46 Reinmar, G. Blauböckchen (Cephalophus monticola [Thunberg, 1798]; Cephalophmae, Bovidae) als Insektenfresser *Mammalian Biology (früher Zeitschrift für Säugetierkunde)* **35** (1969).

47 Kurt, F. Zur Carnivorie bei Cephalophus dorsalis. *Zeitschrift für Säugetierkunde : im Auftrage der Deutschen Gesellschaft für Säugetierkunde e.V* **28**, 309-313 (1963).

48 Western, D. Giraffe chewing a Grant's gazelle carcass. *African Journal of Ecology*, 156-157 (1971). <https://doi.org:https://library.giraffeconservation.org/download/giraffe-chewing-a-grants-gazelle-carcass/>

49 Coppola, F. *et al.* Evidence of scavenging behaviour in crested porcupine. *Sci Rep* **10**, 12297 (2020). <https://doi.org:10.1038/s41598-020-69252-z>

50 BBC. *Elephants have been caught eating weaver bird nests*, < <https://www.bbc.com/news/av/world-36229348>> (2016).

51 Hlusiak, S. *Kangaroo eating a fish at Lucky Bay*, <<http://www.saschahlusiak.de/2014/07/kangaroo-eating-a-fish-at-lucky-bay/>> (2014).

52 Smith, J. E. *et al.* Vole hunting: novel predatory and carnivorous behavior by California ground squirrels. *J Ethol* **43**, 3-12 (2025). <https://doi.org:10.1007/s10164-024-00832-6>

53 Bumann, G. B. & Stauffer, D. F. Scavenging of Ruffed Grouse in the Appalachians: Influences and Implications. *Wildlife Society Bulletin (1973-2006)* **30**, 853-860 (2002).

54 Peers, M. J. L., Majchrzak, Y. N., Konkolics, S. M., Boonstra, R. & Boutin, S. SCAVENGING BY SNOWSHOE HARES (<em>LEPUS AMERICANUS</em>) IN YUKON, CANADA. *Northwestern Naturalist* **99**, 232-235 (2018).
