# Supplementary material
Source: Research Square preprint supplement (doi:10.21203/rs.3.rs-9167723/v1)
Supplement: Supplementary file 3 [file 233b18475bf7e3ed765afbae.xlsx]

## Sheet: Sheet1
Supplementary Table 4: Summary of literature evidence of duikers scavanging.
Duiker species	Observation method	Prey species	Preying method	Prey type	Location, setting	Camera evidence (Reference)
Duiker	Speculation from traces, cultural knowledge	Game	Scavenging	Carrion	Cameroon, Wildlife	No, (Oertzen, 1913)
Duiker	Direct observation	Helmeted guineafowl (Numida meleagris)	Predation	Live adult	Kenya, Wildlife	No (Stoneham, 1953)
Duiker	Stomach content	Helmeted guineafowl (Numida meleagris)	Unknown	Chicks	Zambia, Wildlife	No (Smithers, 1971)
Bay duiker (Cephalophus dorsalis)	Direct observation, photo evidence	Pearl-necked dove (Spilopelia chinensis)	Predation	Live adult	Zurich, Zoo	Yes (Kurt, 1963)
Bay duiker (Cephalophus dorsalis)	Stomach content	Common kusimanse (Crossarchus obscurus)	Probably scavenged	Skeleton and flesh	DRC, Wildlife	No (J. A. Hart, 1985)
Abbot's duiker (Cephalophus spadix)	Camera footage	Tanzanian torrent frog (Arthroleptis yakusini)	Predation	Whole frog	Tanzania, Wildlife	Yes (Rovero et al., 2005)
Bay duiker (Cephalophus dorsalis)	Stomach content	African porcupine (Atherurus africanus )	Probably scavenged	Carrion	Wildlife	No (Kingdon, 2013, pp. 293-294), 297 F Feer personal comm
Yellow-backed duiker (Cephalophus silvicultor)	Direct observation	Pigeon (Columba livia)	Predation	Live adult	Washington, Zoo	No (Kranz & Lumpkin, 1982)
Yellow-backed duiker (Cephalophus silvicultor)	Direct observation	Forest Buffalo (Syncerus caffer nanus)	Scavenging	Carrion	Gabon wildlife	No(Kingdon, 2013, pp. 293-294) 292 L white personal comm
Yellow-backed duiker (Cephalophus silvicultor)	Stomach content	Pangolin (Manidae)	Probably scavenged	Remains	Wildlife	No (Kingdon, 2013, pp. 293-294),292 F Feer personal comm
Yellow-backed duiker (Cephalophus silvicultor)	Direct observation	White-nosed guenon (Cercopithecus nictitans)	Scavenging	Carrion	DRC wildlife	No, (Kingdon, 2013, pp. 293-294) 292 N Shah personal comm
Yellow-backed duiker (Cephalophus silvicultor)	Stomach content	Chameleon, Lizard	Probably scavenged	Remains	DRC Wildlife	No, (Kingdon, 2013, pp. 293-294) 292
