# Supplementary material
Source: Research Square preprint supplement (doi:10.21203/rs.3.rs-9167723/v1)
Supplement: Supplementary file 4 [file 3c22999da755ecdc6ffeef6e.xlsx]

## Sheet: Tabelle1
Supplementary Table 8: Information of OPV positive bushmeat samples from DRC, which were subject to capture, NGS and viral isolation.
Origin	Individual ID	Sample ID	Sample type	Sample state	Storage medium	Extract ID	OPV PCR Ct	OPV Copies/µl	Library copies/input	Capture and NGS	Average sequencing Depth	Genome coverage	Virus identified	Isolation atempt	Isolation
DRC	bm_DRC_20220521_013 DRC Kikwit common duiker	bm_0019	muscle	fresh	NAP	bm_0019_1	33.845	8.28606	414.303	yes	12.3x	0.232	Taterapox-like	yes	no
						bm_0019_2	33.675	123.13	6156.52
						NA_01976	-	-	395.514
						NA_01976	-	-	395.514
						NA_01977	-	-	83.5739
						NA_01977	-	-	83.5739
						NA_01978	-	-	82.2274
						NA_01978	-	-	82.2274
						NA_01979	-	-	30.4697
						NA_01979	-	-	30.4697
						NA_01980	-	-	39.1604
						NA_01980	-	-	39.4305
		bm_0725	skin	fresh	NAP	bm_0725	33.312	7.41216	-	no	-	-	Taterapox-like	yes	no
DRC	bm_DRC_20220626_430 DRC Kole Weyns’s duiker	bm_0407	muscle	fresh	NAP	bm_0407	36.86	0.667481	33.3741	yes	2.1x	0.024	MPXV	no	no
									5.67359
