# Supplementary material
Source: Research Square preprint supplement (doi:10.21203/rs.3.rs-9167723/v1)
Supplement: Supplementary file 5 [file b642103ec605ff1b40731b6c.xlsx]

## Sheet: Sheet1
Supplementary Table 3: Overview of necropsy samples collected from the 36 duiker carcasses in Tai National Park, including molecular detection of orthopoxvirus DNA in necropsy samples and species ID information
Necropsy ID	Species ID	Species ID method	Extract ID	Collection Date	Sample type	Storage medium	OPV qPCR result	OPV Copies/µL	MPXV qPCR result	MPXV Copies/µL	Library 01 copies/ input	Library 01 with/ without size selection	Library 02 copies/ input	Library 02 with/ without size selection	Library 03 copies/ input	Library 03 with/ without size selection	Capture and NGS	Average sequencing Depth	Genome coverage	Isolation atempt	Isolation
N170202	Philantomba maxwellii	molecular	NA_03253	2017-02-02	Liver	liquid nitrogen	negative	-	negative	-	-	-	-	-	-	-	-	-	-	-	-
			NA_03254	2017-02-02	Lung	liquid nitrogen	negative	-	negative	-	-	-	-	-	-	-	-	-	-	-	-
			NA_03255	2017-02-02	Spleen	liquid nitrogen	negative	-	negative	-	-	-	-	-	-	-	-	-	-	-	-
N170205	Unknown sp.	morphological	NA_03256	2017-02-05	Muscle	liquid nitrogen	negative	-	negative	-	-	-	-	-	-	-	-	-	-	-	-
			NA_03257	2017-02-05	Tissue	liquid nitrogen	negative	-	negative	-	-	-	-	-	-	-	-	-	-	-	-
N170223	Unknown sp.	morphological	NA_03258	2017-02-23	Intestine	liquid nitrogen	negative	-	negative	-	-	-	-	-	-	-	-	-	-	-	-
			NA_03259	2017-02-23	Skin	liquid nitrogen	negative	-	negative	-	-	-	-	-	-	-	-	-	-	-	-
N170606	Unknown sp.	morphological	NA_03260	2017-06-06	Liver	liquid nitrogen	negative	-	negative	-	-	-	-	-	-	-	-	-	-	-	-
			NA_03261	2017-06-06	Lung	liquid nitrogen	negative	-	negative	-	-	-	-	-	-	-	-	-	-	-	-
			NA_03262	2017-06-06	Spleen	liquid nitrogen	negative	-	negative	-	-	-	-	-	-	-	-	-	-	-	-
N180507	Unknown sp.	na	NA_03263	2018-05-07	Skin	liquid nitrogen	negative	-	negative	-	-	-	-	-	-	-	-	-	-	-	-
N181021	Cephalophus silvicultor	molecular	NA_03264	2018-10-21	Skin	RNA Later	negative	-	negative	-	-	-	-	-	-	-	-	-	-	-	-
N190107	Philantomba maxwellii	morphological	NA_03266	2019-01-07	Skin	liquid nitrogen	negative	-	negative	-	-	-	-	-	-	-	-	-	-	-	-
			NA_03267	2019-01-07	Tissue	liquid nitrogen	negative	-	negative	-	-	-	-	-	-	-	-	-	-	-	-
N190129	Unknown sp.	morphological	NA_03268	2019-01-29	Skin	RNA Later	negative	-	negative	-	-	-	-	-	-	-	-	-	-	-	-
N190202	Unknown sp.	morphological	NA_03269	2019-02-02	Muscle	RNA Later	negative	-	negative	-	-	-	-	-	-	-	-	-	-	-	-
N190204	Philantomba maxwellii	morphological	NA_03270	2019-02-04	Liver	liquid nitrogen	negative	-	negative	-	-	-	-	-	-	-	-	-	-	-	-
			NA_03271	2019-02-04	Lung	liquid nitrogen	negative	-	negative	-	-	-	-	-	-	-	-	-	-	-	-
			NA_03272	2019-02-04	Spleen	liquid nitrogen	negative	-	negative	-	-	-	-	-	-	-	-	-	-	-	-
N190208	Unknown sp.	morphological	NA_03273	2019-02-08	Muscle	RNA Later	negative	-	negative	-	-	-	-	-	-	-	-	-	-	-	-
N190324	Unknown sp.	morphological	NA_03274	2019-03-24	Skin	na	negative	-	negative	-	-	-	-	-	-	-	-	-	-	-	-
N190411	Unknown sp.	morphological	NA_03275	2019-04-11	Small int.	RNA Later	negative	-	negative	-	-	-	-	-	-	-	-	-	-	-	-
			NA_03277	2019-04-11	Lymph	RNA Later	negative	-	negative	-	-	-	-	-	-	-	-	-	-	-	-
N190412	Unknown sp.	morphological	NA_03278	2019-04-12	Skin	RNA Later	negative	-	negative	-	-	-	-	-	-	-	-	-	-	-	-
			NA_03279	2019-04-12	Muscle	RNA Later	negative	-	negative	-	-	-	-	-	-	-	-	-	-	-	-
N190803	Philantomba maxwellii	molecular	NA_03280	2019-08-03	Liver	RNA Later	negative	-	negative	-	-	-	-	-	-	-	-	-	-	-	-
			NA_03281	2019-08-03	Lung	RNA Later	negative	-	negative	-	-	-	-	-	-	-	-	-	-	-	-
			NA_03282	2019-08-03	Spleen	RNA Later	negative	-	negative	-	-	-	-	-	-	-	-	-	-	-	-
N200122	Philantomba maxwellii	molecular	NA_03283	2020-01-20	Liver	RNA Later	negative	-	negative	-	-	-	-	-	-	-	-	-	-	-	-
			NA_03284	2020-01-20	Lung	RNA Later	negative	-	negative	-	-	-	-	-	-	-	-	-	-	-	-
			NA_03285	2020-01-20	Spleen	RNA Later	negative	-	negative	-	-	-	-	-	-	-	-	-	-	-	-
N200210	Philantomba maxwellii	molecular	NA_03286	2020-02-09	Liver	RNA Later	negative	-	negative	-	-	-	-	-	-	-	-	-	-	-	-
			NA_03287	2020-02-09	Lung	RNA Later	negative	-	negative	-	-	-	-	-	-	-	-	-	-	-	-
			NA_03288	2020-02-09	Spleen	RNA Later	negative	-	negative	-	-	-	-	-	-	-	-	-	-	-	-
N200601	Unknown sp.	morphological	NA_03289	2020-06-01	Lung	liquid nitrogen	negative	-	negative	-	-	-	-	-	-	-	-	-	-	-	-
			NA_03290	2020-06-01	Skin	RNA Later	negative	-	negative	-	-	-	-	-	-	-	-	-	-	-	-
N201020	Cephalophus sp.	morphological	NA_03291	2020-10-20	Small int.	liquid nitrogen	negative	-	negative	-	-	-	-	-	-	-	-	-	-	-	-
			NA_03292	2020-10-20	Stomach	RNA Later	negative	-	negative	-	-	-	-	-	-	-	-	-	-	-	-
N210115	Cephalophus sp.	morphological	NA_03293	2021-01-15	Spleen	RNA Later	negative	-	negative	-	-	-	-	-	-	-	-	-	-	-	-
			NA_03294	2021-01-15	Lung	RNA Later	negative	-	negative	-	-	-	-	-	-	-	-	-	-	-	-
			NA_03295	2021-01-15	Liver	RNA Later	negative	-	negative	-	-	-	-	-	-	-	-	-	-	-	-
N210122	na	na	NA_03301	2021-01-22	Maggots	RNA Later	negative	-	negative	-	-	-	-	-	-	-	-	-	-	-	-
N211011	Cephalophus sp.	morphological	NA_03296	2021-10-11	Lung	RNA Later	negative	-	negative	-	-	-	-	-	-	-	-	-	-	-	-
			NA_03297	2021-10-11	Liver	RNA Later	negative	-	negative	-	-	-	-	-	-	-	-	-	-	-	-
N211110	Philantomba maxwellii	morphological	NA_03298	2021-11-10	Skin	RNA Later	negative	-	negative	-	-	-	-	-	-	-	-	-	-	-	-
			NA_03299	2021-11-10	Spleen	RNA Later	negative	-	negative	-	-	-	-	-	-	-	-	-	-	-	-
N220902	Cephalophus sp.	morphological	NA_01145	2022-09-02	Muscle	RNA later	negative	-	negative	-	-	-	-	-	-	-	-	-	-	-	-
N221215	Cephalophus dorsalis	morphological	NA_01155	2022-12-15	Liver	RNA later	negative	-	negative	-	-	-	-	-	-	-	-	-	-	-	-
			NA_01156	2022-12-15	Spleen	RNA later	negative	-	negative	-	-	-	-	-	-	-	-	-	-	-	-
N230114	Philantomba maxwellii	morphological	NA_01160	2023-01-14	Muscle	RNA later	negative	-	negative	-	-	-	-	-	-	-	-	-	-	-	-
			NA_01161	2023-01-14	Lungs	RNA later	negative	-	negative	-	-	-	-	-	-	-	-	-	-	-	-
N230310	Philantomba maxwellii	morphological	NA_01184	2023-03-10	Liver	RNA later	negative	-	negative	-	-	-	-	-	-	-	-	-	-	-	-
			NA_01185	2023-03-10	Spleen	RNA later	negative	-	negative	-	-	-	-	-	-	-	-	-	-	-	-
			NA_01186	2023-03-10	Lungs	RNA later	negative	-	negative	-	-	-	-	-	-	-	-	-	-	-	-
N230424	Philantomba maxwellii	molecular	NA_01195	2023-04-24	Muscle	RNA later	negative	-	negative	-	-	-	-	-	-	-	-	-	-	-	-
N230505	Philantomba maxwellii	molecular	NA_01199	2023-05-05	TCPMuscle0	RNA later	positive	3.01	positive	3.88	194.194	with	-	-	-	-	yes	18.1 x	0.527	yes	no
			NA_01959	2023-05-05	TCPMuscle1	RNA later	na	-	positive	4.83	54.8	without	114.9	with	144.9	with	yes
			NA_01960	2023-05-05	TCPMuscle2	RNA later	na	-	positive	3.63	77.9	without	79.9	with	79.9	with	yes
			NA_01961	2023-05-05	TCPMuscle3	RNA later	na	-	positive	9.04	174.4	without	180.9	with	180.9	with	yes
			NA_01962	2023-05-05	TCPMuscle4	RNA later	na	-	positive	2.44	38.8	without	60.9	with	60.9	with	yes
			NA_01963	2023-05-05	TCPMuscle5	RNA later	na	-	positive	2.7	-	-	-	-	-	-	-
			NA_02414	2023-05-05	TCPMuscle6	RNA later	na	-	positive	12.76	-	-	-	-	-	-	-
			NA_02415	2023-05-05	TCPMuscle7	RNA later	na	-	positive	67.32	2019.5	without	2019.5	without	-	-	yes
			NA_02416	2023-05-05	TCPMuscle8	RNA later	na	-	positive	4.43	-	-	-	-	-	-	-
			NA_02417	2023-05-05	TCPMuscle9	RNA later	na	-	positive	12.88	-	-	-	-	-	-	-
			NA_01200	2023-05-05	TCPLargeIntestine0	RNA later	negative	-	negative	-	-	-	-	-	-	-	-			yes	no
			NA_01964	2023-05-05	TCPLargeIntestine1	RNA later	na	-	positive	10.89	-	-	-	-	-	-	-
			NA_01965	2023-05-05	TCPLargeIntestine2	RNA later	na	-	positive	2.71	-	-	-	-	-	-	-
			NA_01966	2023-05-05	TCPLargeIntestine3	RNA later	na	-	positive	6.94	-	-	-	-	-	-	-
			NA_01823	2023-05-05	TCPMaggots	RNA later	positive	2.3	positive	0.52	-	-	-	-	-	-	-			-	-
			NA_01824	2023-05-05	TCPStomach0	RNA later	positive	7.96	positive	2.67	26.824	with	-	-	-	-	yes			yes	no
			NA_01967	2023-05-05	TCPStomach1	RNA later	na	-	positive	10.13	-	-	-	-	-	-
			NA_01968	2023-05-05	TCPStomach2	RNA later	na	-	positive	14.14	48	without	49.5	with	49.5	with	yes
			NA_01969	2023-05-05	TCPStomach3	RNA later	na	-	positive	3.37	-	-	-	-	-	-
			NA_01970	2023-05-05	TCPStomach4	RNA later	na	-	positive	5.36	-	-	-	-	-	-
			NA_01971	2023-05-05	TCPStomach5	RNA later	na	-	positive	5.53	-	-	-	-	-	-
			NA_01825	2023-05-05	TCPSmallIntestine0	RNA later	positive	18.07	positive	3.07	-	-	-	-	-	-	-			yes	no
			NA_01972	2023-05-05	TCPSmallIntestine1	RNA later	na	-	positive	55.26	55.4	without	55.3	with	55.3	with	yes
			NA_01973	2023-05-05	TCPSmallIntestine2	RNA later	na	-	negative	-	-	-	-	-	-	-	-
			NA_01974	2023-05-05	TCPSmallIntestine3	RNA later	na	-	negative	-	-	-	-	-	-	-	-
			NA_01826	2023-05-05	TCPMesentericlymph	RNA later	negative	-	negative	-	-	-	-	-	-	-	-			yes	no
			NA_01834	2023-05-05	TCPFeces	na	na	-	positive	0.18	-	-	-	-	-	-	yes			-	-
N230729	Philantomba maxwellii	molecular	NA_01208	2023-07-29	Lung	RNA later	negative	-	negative	-	-	-	-	-	-	-	-	-	-	-	-
			NA_01209	2023-07-29	Liver	RNA later	negative	-	negative	-	-	-	-	-	-	-	-	-	-	-	-
			NA_01210	2023-07-29	Spleen	RNA later	negative	-	negative	-	-	-	-	-	-	-	-	-	-	-	-
N231123	Cephalophus sp.	morphological	NA_01216	2023-11-23	Skin	RNA later	negative	-	negative	-	-	-	-	-	-	-	-	-	-	-	-
N231124	Philantomba maxwellii	molecular	NA_01217	2023-11-24	Muscle	RNA later	negative	-	negative	-	-	-	-	-	-	-	-	-	-	-	-
			NA_01218	2023-11-24	Large Intestine	RNA later	negative	-	negative	-	-	-	-	-	-	-	-	-	-	-	-
N240620	Philantomba maxwellii	molecular	NA_01239	2024-06-20	Muscle	RNA later	negative	-	negative	-	-	-	-	-	-	-	-	-	-	-	-
N241221	Philantomba maxwellii	molecular	NA_01287	2024-12-21	Muscle	RNA later	negative	-	negative	-	-	-	-	-	-	-	-	-	-	-	-
N181015	na	na	NA_03303	2018-10-15	Kidney	RNA Later	negative	-	negative	-	-	-	-	-	-	-	-	-	-	-	-
N211209	na	na	NA_03304	2021-12-09	Skin	na	negative	-	negative	-	-	-	-	-	-	-	-	-	-	-	-
