# Supplementary material
Source: Research Square preprint supplement (doi:10.21203/rs.3.rs-9167723/v1)
Supplement: Supplementary file 6 [file d2fa2fe1807081128832137c.xlsx]

## Sheet: Sheet2
Supplementary Table 7: Summary of camera trap observations at carcasses in TNP and DSPA.
Site	Carcass ID	Carcass	Carcass scientific name	Start date of camera trapping (month/day/year)	End date of camera trapping (month/day/year)	Trap Nights (Number)	Animal observed at carcass	Passing by	Investigating and sniffing	Observed scavenging
TNP	N250602	Black and white colobus	Colobus polykomos	06/03/25	08.06/08/25	5	Genet/civet		x	x
							Unknown			x
							Mongoose			x
							Eagle		x	x
							Duiker	x
	N251022	Black and white colobus	Colobus polykomos	2025-10-22	2025-10-27	5	Genet/civet		x	x
							Unknown
							Duiker		x	x
							Eagle			x
							Bird	x
							Squirrel
	N251115	Western red colobus	Piliocolobus badius	2025-11-15	2025-11-20	4	Bird	x
							Duiker	x
							Mongoose			x
							Wild boar		x
	N251220	Western red colobus	Piliocolobus badius	2025-12-20	2025-12-25	5	Genet/civet			x
	N251220B	Diana Monkey	Cercopithecus diana	2025-12-20	2026-01-08	17	Duiker		x
							Genet/civet		x	x
							Mongoose			x
							Porcupine	x
							Rodent	x
							Squirrel	x
	N260118	Giant puched rat	Cricetomys sp.	2026-01-18	2026-01-30	9	Bird		x
							Chimpanzee	x
							Duiker		x
							Galago	x
							Genet/civet			x
							Squirrel	x
	N260202	Bat	Chiroptera sp.	2026-02-02	2026-02-04	2	Monkey	x
							Unknown	x
	N260203	Duiker	Philantomba sp.	2026-02-03	2026-02-07	4	Mongoose			x
							Genet/civet			x
							Bird	x
DSPA	N_02	Red river hog	Potamochoerus porcus	2017-05-07	2017-05-10	3	Mongoose			x
	N_05	Forest Elephant	Loxodonta cyclotis	2017-05-10	2017-05-12	2	Elephant		x
							Mongoose			x
	N_07	Duiker	Cephalophus sp.	2017-05-21	2017-05-22	1	Mongoose			x
							Duiker	x
	N_09	Putty nosed monkey	Cercopithecus nicticans	2017-06-29	2017-07-01	2	Eagle		x
							Duiker			x
	N_11	Bird	unknown	2017-07-05	2017-07-06	1	Genet	x
							Squirrel	x
							Rat	x
	N_13	Duiker	Cephalophus sp.	2017-07-13	2017-07-14	1.5	Elephant		x
							Vulture		x
							Mongoose			x
	N_18	African wood owl	Strix woodfordii	2017-08-12	2017-08-14	2	Genet			x
							Mongoose			x
							Squirrel		x
	E_08	Forest Elephant	Loxodonta cyclotis	2018-07-06	2018-07-10	3.5	Elephant		x
							Mongoose			x
							Pig
	N_20	Agile mangabey	Cercocebus agilis	2018-08-19	2018-08-23	4	Elephant		x
							Genet			x
							Duiker			x
							Pig	x
							Duiker	x
