# Supplementary material
Source: Research Square preprint supplement (doi:10.21203/rs.3.rs-9167723/v1)
Supplement: Supplementary file 7 [file d92d230fef82892f971bc78a.xlsx]

## Sheet: Total_results_for_stats_1_perce
Supplementary Table 5: Information about duiker pellets and non-duiker mammal species detections from the duiker diet metabarcoding analysis .
Sample	Lat	Lon	Year	Month	Day	Duiker species	Season	metabarcoding	Anomalurus derbianus	Cercocebus atys	Cercopithecus campbelli	Cercopithecus diana	Cercopithecus petaurista	Colobus polykomos	Cricetomys gambianus	Crossarchus obscurus	Funisciurus pyrropus	Genetta pardina	Heliosciurus rufobrachium	Hypsignathus monstrosus	Idiurus macrotis	Perodicticus potto	Procolobus verus	Protoxerus stangeri
F2588	5.87791	-7.33195	2017	7	17	Philantomba maxwellii	Wet	neg	0	0	0	0	0	0	0	0	0	0	0	0	0	0	0	0
F2589	5.87611	-7.33269	2017	7	17	Philantomba maxwellii	Wet	neg	0	0	0	0	0	0	0	0	0	0	0	0	0	0	0	0
F2590	5.87459	-7.33582	2017	7	17	Philantomba maxwellii	Wet	neg	0	0	0	0	0	0	0	0	0	0	0	0	0	0	0	0
F2592	5.87268	-7.32348	2017	7	18	Philantomba maxwellii	Wet	pos	0	1	0	0	0	0	0	0	0	0	0	0	0	0	0	0
F2595	5.8635	-7.33429	2017	11	11	Philantomba maxwellii	Dry	neg	0	0	0	0	0	0	0	0	0	0	0	0	0	0	0	0
F2596	5.8389	-7.32059	2017	11	13	Cephalophus ogilbyi	Dry	pos	0	0	1	0	0	0	0	0	0	0	0	0	0	0	0	0
F2597	5.82245	-7.33188	2017	11	14	Cephalophus ogilbyi	Dry	neg	0	0	0	0	0	0	0	0	0	0	0	0	0	0	0	0
F2598	5.82423	-7.32825	2017	11	14	Philantomba maxwellii	Dry	neg	0	0	0	0	0	0	0	0	0	0	0	0	0	0	0	0
F2599	NA	NA	2017	11	15	Philantomba maxwellii	Dry	neg	0	0	0	0	0	0	0	0	0	0	0	0	0	0	0	0
F2600	NA	NA	2017	11	15	Philantomba maxwellii	Dry	neg	0	0	0	0	0	0	0	0	0	0	0	0	0	0	0	0
F2601	5.78799	-7.33448	2017	11	17	Philantomba maxwellii	Dry	neg	0	0	0	0	0	0	0	0	0	0	0	0	0	0	0	0
F2602	5.78352	-7.32143	2017	11	17	Philantomba maxwellii	Dry	neg	0	0	0	0	0	0	0	0	0	0	0	0	0	0	0	0
F2603	5.78352	-7.32045	2017	11	17	Philantomba maxwellii	Dry	neg	0	0	0	0	0	0	0	0	0	0	0	0	0	0	0	0
F2604	5.79376	-7.32155	2017	11	17	Philantomba maxwellii	Dry	pos	0	0	0	0	0	0	0	0	0	0	0	0	0	1	0	0
F2605	5.80444	-7.3234	2017	11	17	Philantomba maxwellii	Dry	neg	0	0	0	0	0	0	0	0	0	0	0	0	0	0	0	0
F2606	5.80048	-7.3231	2017	11	19	Cephalophus dorsalis	Dry	neg	0	0	0	0	0	0	0	0	0	0	0	0	0	0	0	0
F2608	5.79689	-7.3194	2017	11	19	Philantomba maxwellii	Dry	neg	0	0	0	0	0	0	0	0	0	0	0	0	0	0	0	0
F2610	5.79548	-7.31857	2017	11	19	Philantomba maxwellii	Dry	neg	0	0	0	0	0	0	0	0	0	0	0	0	0	0	0	0
F2611	5.7914	-7.31819	2017	11	19	Philantomba maxwellii	Dry	pos	0	0	1	0	0	0	0	0	0	0	0	0	0	0	0	1
F2613	5.80709	-7.34271	2017	11	21	Cephalophus dorsalis	Dry	pos	0	0	1	0	0	0	0	0	0	0	0	0	0	0	0	0
F2614	5.80665	-7.34936	2017	11	21	Philantomba maxwellii	Dry	neg	0	0	0	0	0	0	0	0	0	0	0	0	0	0	0	0
F2615	5.81329	-7.35112	2017	11	21	Cephalophus dorsalis	Dry	neg	0	0	0	0	0	0	0	0	0	0	0	0	0	0	0	0
F2616	5.8188	-7.3492	2017	11	21	Philantomba maxwellii	Dry	pos	0	0	0	0	0	0	1	0	0	0	0	0	0	0	0	0
F2617	5.81871	-7.34177	2017	11	21	unknown	Dry	neg	0	0	0	0	0	0	0	0	0	0	0	0	0	0	0	0
F2618	5.81308	-7.33164	2017	11	21	Cephalophus dorsalis	Dry	neg	0	0	0	0	0	0	0	0	0	0	0	0	0	0	0	0
F2619	5.80545	-7.32821	2017	11	22	Cephalophus dorsalis	Dry	pos	0	0	0	0	0	0	0	0	1	0	0	0	0	0	0	0
F2620	5.79771	-7.33774	2017	11	22	Philantomba maxwellii	Dry	neg	0	0	0	0	0	0	0	0	0	0	0	0	0	0	0	0
F2622	5.82682	-7.32523	2017	11	24	unknown	Dry	neg	0	0	0	0	0	0	0	0	0	0	0	0	0	0	0	0
F2623	5.8213	-7.3282	2017	11	24	unknown	Dry	neg	0	0	0	0	0	0	0	0	0	0	0	0	0	0	0	0
F2626	5.82178	-7.31875	2017	11	24	Cephalophus dorsalis	Dry	neg	0	0	0	0	0	0	0	0	0	0	0	0	0	0	0	0
F2627	5.79217	-7.322	2017	11	26	Philantomba maxwellii	Dry	neg	0	0	0	0	0	0	0	0	0	0	0	0	0	0	0	0
F2628	5.82116	-7.31925	2017	11	26	Cephalophus dorsalis	Dry	neg	0	0	0	0	0	0	0	0	0	0	0	0	0	0	0	0
F2630	5.84352	-7.32792	2017	12	29	Philantomba maxwellii	Dry	neg	0	0	0	0	0	0	0	0	0	0	0	0	0	0	0	0
F2633	5.83881	-7.32716	2017	12	29	Philantomba maxwellii	Dry	neg	0	0	0	0	0	0	0	0	0	0	0	0	0	0	0	0
F2634	5.83834	-7.32708	2017	12	29	Philantomba maxwellii	Dry	pos	0	0	1	0	0	0	0	0	0	0	0	0	0	0	0	0
F2635	5.83818	-7.3271	2017	12	29	Philantomba maxwellii	Dry	neg	0	0	0	0	0	0	0	0	0	0	0	0	0	0	0	0
F2636	5.83887	-7.32073	2018	1	7	Philantomba maxwellii	Dry	neg	0	0	0	0	0	0	0	0	0	0	0	0	0	0	0	0
F2637	5.87079	-7.3291	2018	1	7	Philantomba maxwellii	Dry	neg	0	0	0	0	0	0	0	0	0	0	0	0	0	0	0	0
F2638	5.868	-7.33172	2018	1	7	unknown	Dry	neg	0	0	0	0	0	0	0	0	0	0	0	0	0	0	0	0
F2639	5.8093	-7.32898	2018	1	16	Philantomba maxwellii	Dry	neg	0	0	0	0	0	0	0	0	0	0	0	0	0	0	0	0
F2640	5.82447	-7.2751	2018	2	4	Philantomba maxwellii	Dry	neg	0	0	0	0	0	0	0	0	0	0	0	0	0	0	0	0
F2641	5.83762	-7.29178	2018	2	5	Philantomba maxwellii	Dry	neg	0	0	0	0	0	0	0	0	0	0	0	0	0	0	0	0
F2642	5.83716	-7.29426	2018	2	5	Philantomba maxwellii	Dry	neg	0	0	0	0	0	0	0	0	0	0	0	0	0	0	0	0
F2643	5.83717	-7.29603	2018	2	5	Philantomba maxwellii	Dry	neg	0	0	0	0	0	0	0	0	0	0	0	0	0	0	0	0
F2644	5.83598	-7.3041	2018	2	5	Philantomba maxwellii	Dry	neg	0	0	0	0	0	0	0	0	0	0	0	0	0	0	0	0
F2645	5.83544	-7.3072	2018	2	5	Philantomba maxwellii	Dry	pos	0	1	0	0	0	0	0	0	0	0	0	0	0	0	0	0
F2646	5.77806	-7.31396	2018	2	6	Cephalophus ogilbyi	Dry	neg	0	0	0	0	0	0	0	0	0	0	0	0	0	0	0	0
F2647	5.79386	-7.3158	2018	2	6	Philantomba maxwellii	Dry	neg	0	0	0	0	0	0	0	0	0	0	0	0	0	0	0	0
F2650	5.81616	-7.31634	2018	2	6	Philantomba maxwellii	Dry	neg	0	0	0	0	0	0	0	0	0	0	0	0	0	0	0	0
F2651	5.80958	-7.32741	2018	2	9	Cephalophus silvicultor	Dry	neg	0	0	0	0	0	0	0	0	0	0	0	0	0	0	0	0
F2652	5.80009	-7.33656	2018	2	9	Philantomba maxwellii	Dry	neg	0	0	0	0	0	0	0	0	0	0	0	0	0	0	0	0
F2653	5.79355	-7.32755	2018	2	10	Philantomba maxwellii	Dry	neg	0	0	0	0	0	0	0	0	0	0	0	0	0	0	0	0
F2654	5.79722	-7.31768	2018	2	10	unknown	Dry	neg	0	0	0	0	0	0	0	0	0	0	0	0	0	0	0	0
F2655	5.81019	-7.32621	2018	2	12	Philantomba maxwellii	Dry	neg	0	0	0	0	0	0	0	0	0	0	0	0	0	0	0	0
F2656	5.79508	-7.33942	2018	2	27	unknown	Dry	neg	0	0	0	0	0	0	0	0	0	0	0	0	0	0	0	0
F2657	5.79845	-7.33637	2018	2	27	unknown	Dry	neg	0	0	0	0	0	0	0	0	0	0	0	0	0	0	0	0
F2659	5.80545	-7.27413	2018	3	5	unknown	Dry	neg	0	0	0	0	0	0	0	0	0	0	0	0	0	0	0	0
F2660	5.83554	-7.27574	2018	3	6	Philantomba maxwellii	Dry	neg	0	0	0	0	0	0	0	0	0	0	0	0	0	0	0	0
F2661	5.82408	-7.27452	2018	3	6	Philantomba maxwellii	Dry	neg	0	0	0	0	0	0	0	0	0	0	0	0	0	0	0	0
F2662	5.81997	-7.2731	2018	3	6	Philantomba maxwellii	Dry	neg	0	0	0	0	0	0	0	0	0	0	0	0	0	0	0	0
F2663	5.79749	-7.27113	2018	3	7	Cephalophus ogilbyi	Dry	pos	0	0	1	0	0	0	0	0	0	0	0	0	0	0	0	0
F2664	5.82745	-7.29179	2018	3	20	Philantomba maxwellii	Dry	neg	0	0	0	0	0	0	0	0	0	0	0	0	0	0	0	0
F2665	5.83432	-7.29291	2018	3	20	Philantomba maxwellii	Dry	neg	0	0	0	0	0	0	0	0	0	0	0	0	0	0	0	0
F2666	5.78786	-7.29937	2018	4	20	unknown	Wet	neg	0	0	0	0	0	0	0	0	0	0	0	0	0	0	0	0
F2667	5.78794	-7.30595	2018	4	20	Cephalophus dorsalis	Wet	neg	0	0	0	0	0	0	0	0	0	0	0	0	0	0	0	0
F2668	5.7839	-7.30473	2018	4	21	Philantomba maxwellii	Wet	pos	0	0	0	0	0	0	0	0	0	1	0	0	0	0	0	0
F2669	5.78172	-7.3075	2018	4	23	Philantomba maxwellii	Wet	neg	0	0	0	0	0	0	0	0	0	0	0	0	0	0	0	0
F2670	5.79082	-7.31712	2018	4	24	Cephalophus ogilbyi	Wet	neg	0	0	0	0	0	0	0	0	0	0	0	0	0	0	0	0
F2671	5.79226	-7.31741	2018	4	24	Cephalophus ogilbyi	Wet	neg	0	0	0	0	0	0	0	0	0	0	0	0	0	0	0	0
F2672	5.79287	-7.3174	2018	4	24	Philantomba maxwellii	Wet	neg	0	0	0	0	0	0	0	0	0	0	0	0	0	0	0	0
F2673	5.78401	-7.31072	2018	4	29	Philantomba maxwellii	Wet	neg	0	0	0	0	0	0	0	0	0	0	0	0	0	0	0	0
F2674	5.78981	-7.3131	2018	4	29	Cephalophus ogilbyi	Wet	pos	0	1	0	0	0	0	0	0	0	0	0	0	0	0	0	0
F2675	5.789	-7.31405	2018	4	29	Philantomba maxwellii	Wet	neg	0	0	0	0	0	0	0	0	0	0	0	0	0	0	0	0
F2676	5.81878	-7.34536	2018	5	3	Cephalophus ogilbyi	Wet	neg	0	0	0	0	0	0	0	0	0	0	0	0	0	0	0	0
F2677	5.82014	-7.33527	2018	5	3	Philantomba maxwellii	Wet	neg	0	0	0	0	0	0	0	0	0	0	0	0	0	0	0	0
F2678	5.83097	-7.33218	2018	5	6	Cephalophus ogilbyi	Wet	neg	0	0	0	0	0	0	0	0	0	0	0	0	0	0	0	0
F2679	5.82057	-7.32779	2018	5	6	Philantomba maxwellii	Wet	neg	0	0	0	0	0	0	0	0	0	0	0	0	0	0	0	0
F2680	5.82244	-7.34892	2018	5	8	Cephalophus jentinki	Wet	pos	0	0	1	0	0	0	0	0	0	0	0	0	0	0	0	0
F2681	5.87321	-7.34776	2018	6	16	Philantomba maxwellii	Wet	neg	0	0	0	0	0	0	0	0	0	0	0	0	0	0	0	0
F2682	5.87543	-7.34684	2018	6	16	Philantomba maxwellii	Wet	neg	0	0	0	0	0	0	0	0	0	0	0	0	0	0	0	0
F2683	5.87978	-7.34862	2018	6	16	Philantomba maxwellii	Wet	pos	0	0	0	0	0	0	0	0	0	0	0	0	0	0	0	1
F2684	5.88915	-7.34768	2018	6	16	Philantomba maxwellii	Wet	pos	0	0	0	0	0	0	0	0	0	0	0	0	0	0	0	1
F2685	5.8706	-7.34425	2018	6	18	Philantomba maxwellii	Wet	neg	0	0	0	0	0	0	0	0	0	0	0	0	0	0	0	0
F2686	5.87477	-7.3453	2018	6	18	Philantomba maxwellii	Wet	neg	0	0	0	0	0	0	0	0	0	0	0	0	0	0	0	0
F2687	5.88142	-7.3429	2018	6	18	Philantomba maxwellii	Wet	neg	0	0	0	0	0	0	0	0	0	0	0	0	0	0	0	0
F2688	5.87725	-7.34169	2018	6	18	Cephalophus ogilbyi	Wet	neg	0	0	0	0	0	0	0	0	0	0	0	0	0	0	0	0
F2689	5.8822	-7.33673	2018	6	18	Philantomba maxwellii	Wet	neg	0	0	0	0	0	0	0	0	0	0	0	0	0	0	0	0
F2690	5.88947	-7.33483	2018	6	20	Philantomba maxwellii	Wet	pos	0	0	0	0	0	0	0	0	0	0	0	0	0	0	0	1
F2691	5.87365	-7.3325	2018	6	20	Philantomba maxwellii	Wet	neg	0	0	0	0	0	0	0	0	0	0	0	0	0	0	0	0
F3215	5.83817	-7.28579	2018	8	26	Philantomba maxwellii	Wet	neg	0	0	0	0	0	0	0	0	0	0	0	0	0	0	0	0
F3216	5.83842	-7.28749	2018	8	26	Cephalophus ogilbyi	Wet	neg	0	0	0	0	0	0	0	0	0	0	0	0	0	0	0	0
F3217	5.83915	-7.28742	2018	8	26	Philantomba maxwellii	Wet	pos	0	0	0	0	0	0	0	0	0	0	0	0	0	0	0	1
F3218	5.82378	-7.27658	2018	8	26	Philantomba maxwellii	Wet	neg	0	0	0	0	0	0	0	0	0	0	0	0	0	0	0	0
F3219	5.82669	-7.27769	2018	8	26	Philantomba maxwellii	Wet	neg	0	0	0	0	0	0	0	0	0	0	0	0	0	0	0	0
F3220	5.8336	-7.27772	2018	8	28	Philantomba maxwellii	Wet	neg	0	0	0	0	0	0	0	0	0	0	0	0	0	0	0	0
F3221	5.82953	-7.28211	2018	8	28	Philantomba maxwellii	Wet	neg	0	0	0	0	0	0	0	0	0	0	0	0	0	0	0	0
F3222	5.83034	-7.28196	2018	8	29	unknown	Wet	neg	0	0	0	0	0	0	0	0	0	0	0	0	0	0	0	0
F3223	5.83174	-7.28272	2018	8	30	Philantomba maxwellii	Wet	neg	0	0	0	0	0	0	0	0	0	0	0	0	0	0	0	0
F3224	5.83658	-7.28262	2018	8	31	Philantomba maxwellii	Wet	neg	0	0	0	0	0	0	0	0	0	0	0	0	0	0	0	0
F3225	5.83458	-7.32888	2018	9	10	Cephalophus ogilbyi	Wet	pos	0	1	0	0	0	0	0	0	0	0	0	0	0	0	0	0
F3226	5.83014	-7.33361	2018	9	10	Philantomba maxwellii	Wet	neg	0	0	0	0	0	0	0	0	0	0	0	0	0	0	0	0
F3227	5.82653	-7.31803	2018	10	11	Philantomba maxwellii	Wet	neg	0	0	0	0	0	0	0	0	0	0	0	0	0	0	0	0
F3228	5.83225	-7.32062	2018	10	12	Philantomba maxwellii	Wet	neg	0	0	0	0	0	0	0	0	0	0	0	0	0	0	0	0
F3230	5.83151	-7.32469	2018	10	12	Philantomba maxwellii	Wet	neg	0	0	0	0	0	0	0	0	0	0	0	0	0	0	0	0
F3232	5.83408	-7.33038	2018	10	12	Philantomba maxwellii	Wet	neg	0	0	0	0	0	0	0	0	0	0	0	0	0	0	0	0
F3233	5.83711	-7.32165	2018	10	12	Philantomba maxwellii	Wet	pos	0	0	1	0	0	0	0	0	0	0	0	0	0	0	0	0
F3234	5.8035	-7.30739	2018	10	15	Philantomba maxwellii	Wet	pos	0	0	0	0	0	0	0	1	0	0	0	0	0	0	0	0
F3235	5.80366	-7.30575	2018	10	15	Philantomba maxwellii	Wet	neg	0	0	0	0	0	0	0	0	0	0	0	0	0	0	0	0
F3237	5.80498	-7.30412	2018	10	15	Philantomba maxwellii	Wet	neg	0	0	0	0	0	0	0	0	0	0	0	0	0	0	0	0
F3238	5.8089	-7.30444	2018	10	15	Philantomba maxwellii	Wet	pos	0	0	0	0	0	0	0	0	0	0	0	1	0	0	0	0
F3239	5.80897	-7.32346	2018	10	31	Philantomba maxwellii	Wet	neg	0	0	0	0	0	0	0	0	0	0	0	0	0	0	0	0
F3240	5.80164	-7.27524	2018	11	30	Philantomba maxwellii	Dry	neg	0	0	0	0	0	0	0	0	0	0	0	0	0	0	0	0
F3241	5.81724	-7.25977	2018	12	1	unknown	Dry	neg	0	0	0	0	0	0	0	0	0	0	0	0	0	0	0	0
F3243	5.78594	-7.32841	2018	12	15	Philantomba maxwellii	Dry	pos	0	0	0	0	0	0	0	1	0	0	0	0	0	0	0	0
F3244	5.79817	-7.30812	2018	12	16	Philantomba maxwellii	Dry	pos	0	0	0	0	0	0	0	0	0	0	0	0	0	0	0	1
F3245	5.81721	-7.31767	2018	12	21	Cephalophus ogilbyi	Dry	pos	0	1	0	0	0	0	0	0	0	0	0	0	0	0	0	0
F3246	5.81748	-7.32366	2018	12	21	Cephalophus ogilbyi	Dry	pos	0	0	0	0	0	0	0	0	0	0	0	0	1	0	0	0
F3250	5.82332	-7.2734	2018	12	26	Cephalophus dorsalis	Dry	neg	0	0	0	0	0	0	0	0	0	0	0	0	0	0	0	0
F3247	5.81655	-7.31621	2018	12	22	Philantomba maxwellii	Dry	neg	0	0	0	0	0	0	0	0	0	0	0	0	0	0	0	0
F3249	5.81956	-7.31717	2018	12	24	Philantomba maxwellii	Dry	neg	0	0	0	0	0	0	0	0	0	0	0	0	0	0	0	0
F3251	5.83971	-7.26529	2018	12	27	Philantomba maxwellii	Dry	neg	0	0	0	0	0	0	0	0	0	0	0	0	0	0	0	0
F3252	5.84714	-7.27716	2018	12	27	Philantomba maxwellii	Dry	neg	0	0	0	0	0	0	0	0	0	0	0	0	0	0	0	0
F3253	5.80801	-7.30431	2019	9	25	Philantomba maxwellii	Dry	neg	0	0	0	0	0	0	0	0	0	0	0	0	0	0	0	0
F3255	5.78916	-7.3054	2019	9	26	Philantomba maxwellii	Dry	neg	0	0	0	0	0	0	0	0	0	0	0	0	0	0	0	0
F3256	5.83693	-7.32096	2019	10	3	Philantomba maxwellii	Dry	neg	0	0	0	0	0	0	0	0	0	0	0	0	0	0	0	0
F3263	5.82943	-7.33033	2019	10	4	Philantomba maxwellii	Dry	neg	0	0	0	0	0	0	0	0	0	0	0	0	0	0	0	0
F3264	5.83792	-7.28358	2019	10	7	Philantomba maxwellii	Dry	neg	0	0	0	0	0	0	0	0	0	0	0	0	0	0	0	0
F3265	5.80205	-7.28301	2019	10	7	Philantomba maxwellii	Dry	neg	0	0	0	0	0	0	0	0	0	0	0	0	0	0	0	0
F3266	5.83861	-7.28314	2019	10	7	Cephalophus dorsalis	Dry	pos	0	1	1	0	0	0	0	0	0	0	0	0	0	0	0	0
F3267	5.81368	-7.27896	2019	10	7	Philantomba maxwellii	Dry	neg	0	0	0	0	0	0	0	0	0	0	0	0	0	0	0	0
F3268	5.79985	-7.31357	2019	10	10	Philantomba maxwellii	Dry	neg	0	0	0	0	0	0	0	0	0	0	0	0	0	0	0	0
F3269	5.79376	-7.31009	2019	10	10	Philantomba maxwellii	Dry	neg	0	0	0	0	0	0	0	0	0	0	0	0	0	0	0	0
F3270	5.80169	-7.27481	2019	10	15	Philantomba maxwellii	Dry	neg	0	0	0	0	0	0	0	0	0	0	0	0	0	0	0	0
F3271	5.81331	-7.27886	2019	10	15	Philantomba maxwellii	Dry	pos	0	0	1	0	0	0	0	0	0	0	0	0	0	0	0	0
F3272	5.83817	-7.28355	2019	10	16	Philantomba maxwellii	Dry	neg	0	0	0	0	0	0	0	0	0	0	0	0	0	0	0	0
F3273	5.83481	-7.27562	2019	10	18	Philantomba maxwellii	Dry	neg	0	0	0	0	0	0	0	0	0	0	0	0	0	0	0	0
F3274	5.82488	-7.27465	2019	10	18	Philantomba maxwellii	Dry	neg	0	0	0	0	0	0	0	0	0	0	0	0	0	0	0	0
F3275	5.86721	-7.34072	2019	11	13	Philantomba maxwellii	Dry	neg	0	0	0	0	0	0	0	0	0	0	0	0	0	0	0	0
F3276	5.86701	-7.3492	2019	11	13	Philantomba maxwellii	Dry	neg	0	0	0	0	0	0	0	0	0	0	0	0	0	0	0	0
F3277	NA	NA	2019	12	3	Philantomba maxwellii	Dry	neg	0	0	0	0	0	0	0	0	0	0	0	0	0	0	0	0
F3278	NA	NA	2019	12	3	Philantomba maxwellii	Dry	pos	1	1	0	0	0	0	0	0	0	0	0	0	0	0	0	0
F3279	NA	NA	2019	12	3	Philantomba maxwellii	Dry	pos	0	1	1	0	0	0	0	0	0	0	0	0	0	0	0	0
F3280	NA	NA	2020	1	8	Philantomba maxwellii	Dry	pos	0	1	0	0	0	0	0	0	0	0	0	0	0	0	0	1
F3281	NA	NA	2020	2	24	Philantomba maxwellii	Dry	pos	0	0	1	0	0	0	0	0	0	0	0	0	0	0	0	0
F3282	NA	NA	2020	2	24	Philantomba maxwellii	Dry	neg	0	0	0	0	0	0	0	0	0	0	0	0	0	0	0	0
F3283	NA	NA	2016	10	14	Philantomba maxwellii	Dry	neg	0	0	0	0	0	0	0	0	0	0	0	0	0	0	0	0
