# Supplementary material
Source: Research Square preprint supplement (doi:10.21203/rs.3.rs-9167723/v1)
Supplement: Supplementary file 8 [file dbc59b95b95e3bbdc22aa814.xlsx]

## Sheet: cleaned
Supplementary Table 6: Results from the duiker diet metabarcoding analysis, showing the number of reads from non-duiker species remaining after filtering.
Duiker pellet sample ID	Non-duiker species detected in the duiker pellet.
	Cercopithecus campbelli	Cercocebus atys	Crossarchus obscurus	Protoxerus stangeri	Anomalurus derbianus	Idiurus macrotis	Perodicticus potto	Hypsignathus monstrosus	Genetta pardina	unclassified Cricetomys	Funisciurus pyrropus
2626	0	0	0	0	0	0	0	0	0	0	0
3225	0	10380	0	0	0	0	0	0	0	0	0
F2588	0	0	0	0	0	0	0	0	0	0	0
F2589	0	0	0	0	0	0	0	0	0	0	0
F2592	0	0	0	0	0	0	0	0	0	0	0
F2596	45	0	0	0	0	0	0	0	0	0	0
F2597	0	0	0	0	0	0	0	0	0	0	0
F2598	0	0	0	0	0	0	0	0	0	0	0
F2599	0	0	0	0	0	0	0	0	0	0	0
F2600	0	0	0	0	0	0	0	0	0	0	0
F2601	0	0	0	0	0	0	0	0	0	0	0
F2602	0	0	0	0	0	0	0	0	0	0	0
F2603_2	0	0	0	0	0	0	0	0	0	0	0
F2604_2	0	0	0	0	0	0	214	0	0	0	0
F2605	0	190	0	0	0	0	0	0	0	0	0
F2606_2	0	83	0	0	0	0	0	0	0	0	0
F2608	0	0	0	0	0	0	0	0	0	0	0
F2610	0	0	0	0	0	0	0	0	0	0	0
F2611_2	577	0	0	723	0	0	0	0	0	0	0
F2613	72	0	0	0	0	0	0	0	0	0	0
F2614_2	0	0	0	0	0	0	0	0	0	0	0
F2616	0	0	0	0	0	0	0	0	0	1838	0
F2618	0	0	0	0	0	0	0	0	0	0	0
F2619	0	0	0	0	0	0	0	0	0	0	25
F2620	0	0	0	0	0	0	0	0	0	0	0
F2628	0	0	0	0	0	0	0	0	0	0	0
F2634	41	1246	0	0	0	0	0	0	0	0	0
F2640	0	0	0	0	0	0	0	0	0	0	0
F2641	0	0	0	0	0	0	0	0	0	0	0
F2643	0	0	0	0	0	0	0	0	0	0	0
F2645	0	0	0	0	0	0	0	0	0	0	0
F2647	0	525	0	0	0	0	0	0	0	0	0
F2650	0	0	0	0	0	0	0	0	0	0	0
F2651_2	0	0	0	0	0	0	0	0	0	0	0
F2652	0	0	0	0	0	0	0	0	0	0	0
F2653	0	0	0	0	0	0	0	0	0	0	0
F2660	0	0	0	0	0	0	0	0	0	0	0
F2663	693	0	0	0	0	0	0	0	0	0	0
F2664	0	194	0	0	0	0	0	0	0	0	0
F2665	0	555	0	0	0	0	0	0	0	0	0
F2667_2	0	0	0	0	0	0	0	0	0	0	0
F2668	0	0	0	0	0	0	0	0	46	0	0
F2669	0	0	0	0	0	0	0	0	0	0	0
F2670	0	0	0	0	0	0	0	0	0	0	0
F2671	0	0	0	0	0	0	0	0	0	0	0
F2672	0	0	0	0	0	0	0	0	0	0	0
F2674	0	658	0	0	0	0	0	0	0	0	0
F2675	0	0	0	0	0	0	0	0	0	0	0
F2676	0	0	0	0	0	0	0	0	0	0	0
F2677	0	0	0	0	0	0	0	0	0	0	0
F2678	0	0	0	0	0	0	0	0	0	0	0
F2679	0	0	0	0	0	0	0	0	0	0	0
F2680	71	0	0	0	0	0	0	0	0	0	0
F2681	0	0	0	0	0	0	0	0	0	0	0
F2683	0	0	0	75	0	0	0	0	0	0	0
F2684	0	94	0	448	0	0	0	0	0	0	0
F2685	0	0	0	0	0	0	0	0	0	0	0
F2686	0	0	0	0	0	0	0	0	0	0	0
F2687	0	0	0	0	0	0	0	0	0	0	0
F2688	0	0	0	0	0	0	0	0	0	0	0
F2689	0	0	0	0	0	0	0	0	0	0	0
F2690	0	0	0	160	0	0	0	0	0	0	26
F2691	0	0	0	0	0	0	0	0	0	0	0
F3215	0	0	0	0	0	0	0	0	0	0	0
F3216	0	0	0	0	0	0	0	0	0	0	0
F3217	0	0	0	304	0	0	0	0	0	0	0
F3219	0	0	0	0	0	0	0	0	0	0	0
F3220_2	0	0	0	0	0	0	0	0	0	0	0
F3222	0	0	0	0	0	0	0	0	0	0	0
F3223	0	0	0	0	0	0	0	0	0	0	0
F3224	0	0	0	0	0	0	0	0	0	0	0
F3226	0	0	0	0	0	0	0	0	0	0	0
F3227	0	0	0	0	0	0	0	0	0	0	0
F3228	0	0	0	0	0	0	0	0	0	0	0
F3232	0	0	0	0	0	0	0	0	0	0	0
F3233	3565	0	0	0	0	0	0	0	0	0	0
F3234	0	0	4428	0	0	0	0	0	0	0	0
F3235	0	0	0	0	0	0	0	0	0	0	0
F3237	0	0	0	0	0	0	0	0	0	0	0
F3238	0	0	0	0	0	0	0	199	0	0	0
F3240	0	0	0	0	0	0	0	0	0	0	0
F3243	0	0	658	0	0	0	0	0	0	0	0
F3244	0	0	0	574	0	0	0	0	0	0	0
F3245	0	4756	0	0	0	0	0	0	0	0	0
F3246	0	589	0	0	0	250	0	0	0	0	0
F3247	0	0	0	0	0	0	0	0	0	0	0
F3250	0	0	0	0	0	0	0	0	0	0	0
F3252	0	2217	0	0	0	0	0	0	0	0	0
F3253	0	189	0	0	0	0	0	0	0	0	0
F3256	0	0	0	0	0	0	0	0	0	0	0
F3263	0	0	0	0	0	0	0	0	0	0	0
F3266	211	6729	0	0	0	0	0	0	0	0	0
F3267	0	0	0	0	0	0	0	0	0	0	0
F3271	235	0	0	0	0	0	0	0	0	0	0
F3278	0	4197	0	0	384	0	0	0	0	0	0
F3279	196	6192	0	0	0	0	0	0	0	0	0
F3280	0	2490	0	667	0	0	0	0	0	0	0
F3281	954	2775	0	0	0	0	0	0	0	0	0
NTC_221017	0	0	0	0	0	0	0	0	0	0	0
NTC_221019	0	0	0	0	0	0	0	0	0	0	0
NTC_221020	0	0	0	0	0	0	0	0	0	0	0
NTC_221026	0	0	0	0	0	0	0	0	0	0	0
NTC_221028	0	0	0	0	0	0	0	0	0	0	0
NTC_221029	0	0	0	0	0	0	0	0	0	0	0
NTC_221107	0	0	0	0	0	0	0	0	0	0	0
NTC_221113	0	0	0	0	0	0	0	0	0	0	0
Neg_220509	0	0	0	0	0	0	0	0	0	0	0
Neg_220510	0	0	0	0	0	0	0	0	0	0	0
Neg_220524	0	0	0	0	0	0	0	0	0	0	0
Neg_220531	0	0	0	0	0	0	0	0	0	0	0
Neg_22060101	0	0	0	0	0	0	0	0	0	0	0
Neg_22060102	0	0	0	0	0	0	0	0	0	0	0
Neg_221101	0	0	0	0	0	0	0	0	0	0	0
Neg_221108	0	0	0	0	0	0	0	0	0	0	0

## Sheet: community_matrix_r10_p1
Scientific_Name	Taxid	Assign_Rank	Dominant_Seq	Total_Counts	2626	3225	F2588	F2589	F2591	F2592	F2596	F2597	F2598	F2599	F2600	F2601	F2602	F2603_2	F2604_2	F2605	F2606_2	F2608	F2610	F2611_2	F2612_2	F2613	F2614_2	F2616	F2618	F2619	F2620	F2621	F2624	F2628	F2629	F2634	F2640	F2641	F2643	F2645	F2647	F2649	F2650	F2651_2	F2652	F2653	F2660	F2663	F2664
Cercopithecus diana	36224	species	gcacaaccaaacctccgaagaatccatgctaaggctacacaagcctaagcaaactaatacccacaattgacccaacaatttgatcaacggaaca	63309	0	332	492	44	30	145	164	595	799	540	29	751	0	185	243	96	25	15	0	174	77	66	117	6748	3263	172	0	794	75	56	0	15	62	102	108	118	0	891	0	0	15	0	229	340	442
Piliocolobus badius	164648	species	gcataattaaacctccgaatagtccatgccaagactacacaagtcaaagctaatcagtatctacaattgatccaacaacttgatcaacggaaca	55044	0	466	3032	255	0	0	0	153	0	0	1216	16	750	0	0	0	26	0	0	0	0	80	0	3103	7037	0	0	0	22	0	1211	0	282	0	674	0	177	285	0	13	256	0	0	0	0
Pan troglodytes	9598	species	gcataattcaacctccgagcaacctaaactaagactgcactagcctaagcaagttaatatatattgacccgataatttgatcaacggagta	50886	0	0	0	0	0	0	0	21	20	0	0	0	0	68	0	21	0	16	0	74	0	28	0	5136	0	0	57	0	0	0	0	0	125	0	107	21	10	0	0	79	0	17	0	0	0
Procolobus verus	373033	species	gcacaattaaacctccgaatagtccatgctaagaccacacaagtcaaggctaccagtatctataattgatccaataacttgatcaacggaaca	29090	0	376	0	0	0	0	0	0	0	0	0	0	0	0	0	0	226	0	0	0	173	514	0	6107	0	48	0	0	19	11	0	0	0	0	0	0	0	0	0	0	0	0	0	0	0
Macaca fascicularis	9541	species	gcataactaaacctccgaacaacctatgctaaggctacacaagccaaaacggactaacacctataattgatccaataacttcaccaatggaaca	24627	0	1124	0	0	0	26	0	0	0	0	0	265	0	32	0	67	119	0	0	0	129	12	179	0	0	0	0	0	0	0	0	0	0	0	0	0	70	0	0	0	0	0	0	0	0
Colobus guereza	33548	species	gcataatcaaacctccgaatagtccaggccaagactatactagtcgaagctaaccaatatctacaattgatccaataaattgatcaacggaaaa	14805	0	0	0	0	0	0	258	0	0	0	0	0	0	0	0	0	0	0	0	0	39	0	0	0	0	0	0	0	0	0	0	0	0	0	0	0	0	0	126	0	0	0	70	0	0
Cercopithecus campbelli	303588	species	gcacaactaaacctccgaagaattcatgctaagactatacaagcctaagcaaattaacatccacaattgacccaatagtttgatcaacggaata	6893	0	0	0	0	13	0	45	0	0	0	0	0	0	0	0	0	0	0	0	577	0	72	0	0	0	29	0	0	0	0	0	41	0	0	0	0	0	21	0	0	33	0	0	693	0
Crossarchus obscurus	71111	species	gaacaaaacaacctccgagtgatttttaatctagacccacaagtcaaaagtaccacatcacttattgatccaaaacacttgatcaacggaaca	3234	0	0	0	0	0	0	0	0	0	0	0	0	0	0	0	0	0	0	0	0	0	0	0	0	0	0	0	0	0	0	0	0	0	0	0	0	0	0	0	0	0	0	0	0	0
Protoxerus stangeri	226692	species	gcacaaaacaacctccgaatgatattaatccagacagacacgtctaaatatctactcataaattgacccaaacttatttgagcaacggaaca	2951	0	0	0	0	0	0	0	0	0	0	0	0	0	0	0	0	0	0	0	723	0	0	0	0	0	0	0	0	0	0	0	0	0	0	0	0	0	0	0	0	0	0	0	0	0
Nandinia binotata	71115	species	gaacaaaacaacctccgagtgattataaatctagacaaaccagtcaaaagtataacatcacttattgatccaaaaattttgatcaacggaaca	1451	0	0	0	0	0	0	0	0	0	0	0	0	0	0	0	0	0	0	0	0	0	0	0	0	0	0	0	0	0	0	0	0	0	0	0	0	0	0	0	0	0	0	0	0	0
Anomalurus derbianus	2022012	species	gcacaaaacaacctccgaatgatctaggcctagactaactagtcaaagcaacaataatcacaaattgacccataatttgatcaacgaacca	384	0	0	0	0	0	0	0	0	0	0	0	0	0	0	0	0	0	0	0	0	0	0	0	0	0	0	0	0	0	0	0	0	0	0	0	0	0	0	0	0	0	0	0	0	0
Idiurus macrotis	101667	species	gcaaaaccaaacctccgaatggtttgaatcctagactaactagtcaaagcaatatgatcattaattgacccataacttgaacaacgaacca	250	0	0	0	0	0	0	0	0	0	0	0	0	0	0	0	0	0	0	0	0	0	0	0	0	0	0	0	0	0	0	0	0	0	0	0	0	0	0	0	0	0	0	0	0	0
Perodicticus potto	9472	species	gcacaaaacaacctccgaactattcatgcctagacacaaccagtcaaagccccttataaacatattgacccaaaaattgaccaacggaaca	214	0	0	0	0	0	0	0	0	0	0	0	0	0	0	214	0	0	0	0	0	0	0	0	0	0	0	0	0	0	0	0	0	0	0	0	0	0	0	0	0	0	0	0	0	0
Hypsignathus monstrosus	448084	species	atataaagcaactcccgagtgatatagtttagaccaacaagtcgaaaccccttatcatttagtgatccaatttcttttgatcaacggaaca	199	0	0	0	0	0	0	0	0	0	0	0	0	0	0	0	0	0	0	0	0	0	0	0	0	0	0	0	0	0	0	0	0	0	0	0	0	0	0	0	0	0	0	0	0	0
Philantomba maxwellii	907741	species	gaataaaaaatcctccgagcgattttaaagactagacccacaagtcaaatcaaattatcgcttattgatccaaaaacttgatcaacggaaca	185	0	0	113	0	0	0	0	0	0	0	0	0	0	72	0	0	0	0	0	0	0	0	0	0	0	0	0	0	0	0	0	0	0	0	0	0	0	0	0	0	0	0	0	0	0
Colobus satanas	517012	species	gcataatcaaacctccgaatagtccaggccaagactatactagtcgaagctaatcaatatctacaattgatccaataaattgatcaacggaaaa	166	0	0	0	0	0	0	0	0	0	0	0	0	0	0	0	0	0	0	0	0	0	0	0	0	0	0	0	0	0	0	0	0	0	0	0	0	0	0	0	0	0	0	0	0	0
Crossarchus platycephalus	1096449	species	gaacaaaacaacctccgagtgatttttaatctagacccacaggtcaaaagtattacatcacttattgatccaaaacacwtgatcaacggaaca	121	0	0	0	0	0	0	0	0	0	0	0	0	0	0	0	0	0	0	0	0	0	0	0	0	0	0	0	0	0	0	0	0	0	0	0	0	0	0	0	0	0	0	0	0	0
Cercocebus sp. Y45	2959324	species	gcacaactaaacctccgaataattaatgctaagactatacaagtcaaagcggactaacatttacaactgatccaataacttgatcaacggaaca	69	0	0	0	0	0	21	0	0	0	0	0	0	0	0	0	0	0	0	0	0	0	0	0	0	0	0	0	0	0	0	0	0	0	0	0	48	0	0	0	0	0	0	0	0	0
Genetta pardina	235204	species	gtacaaaacaacctccgaacgatttaaatcaagacttaccagtcaaaagtactacatcacttattgatccaaaaacatttgatcaacggaaca	27	0	0	0	0	0	0	0	0	0	0	0	0	0	0	0	0	0	0	0	0	0	0	0	0	0	0	0	0	0	0	0	0	0	0	0	0	0	0	0	0	0	0	0	0	0
Cephalophus jentinki	129225	species	gaataaaagatccttcgagcgattttaaagaccagacctacaagtcgaatcgaaccatcgcttattgatccaaaaacttgatcaacggaaca	20	0	0	0	0	0	0	0	0	0	0	0	0	0	0	0	0	0	0	0	0	0	0	0	0	0	0	0	0	0	0	0	0	0	0	0	0	0	0	0	0	0	0	0	0	0
Sus scrofa	9823	species	gtacaaaaaccctccgagtgattttaatctagacaaaccagtcaaaataaccataacatcacttattgatccaaaattttgatcaacggaaca	14	0	0	0	0	0	0	0	0	0	0	0	0	0	0	0	0	0	0	0	0	0	0	0	0	0	0	0	0	0	0	0	0	0	0	0	0	0	0	0	0	0	0	0	0	0
Hilsa kelee	529102	species	ggagaacacagcctccgagaggactgggaaaaccctgaaaccaagagccacagctctaagtcacaaaacatttgacctattagtgatccggcctactgccgatcaacggacca	12	0	0	0	0	0	0	0	0	0	0	0	0	0	12	0	0	0	0	0	0	0	0	0	0	0	0	0	0	0	0	0	0	0	0	0	0	0	0	0	0	0	0	0	0	0
Gorilla gorilla gorilla	9595	subspecies	gcataatttaacctccgagcaacctatgctaagactaaacaagtttaagcgaattactatacatatattgacccaataatttgatcaacggaaca	13528	0	0	0	0	0	0	0	0	0	0	0	0	0	0	0	91	11	0	0	0	0	0	0	0	0	0	168	0	0	0	0	0	287	96	50	41	23	0	32	30	56	34	0	0	0
Macaca	9539	genus	gcataatccaacctccaaacaacctatgctaaggctacaccagccaaagcgaatcaatatgcataactgacccaataacttgaccaatggaaca	17037	0	849	0	0	0	0	97	0	0	0	0	0	0	0	0	0	13	0	0	0	0	20	0	0	0	0	0	0	0	0	0	0	0	0	0	0	0	0	32	0	0	0	0	0	0
Cercopithecus	9533	genus	gcacaactaaacctccgaataatccacgctaagactatacaagtcaaagcaaactgacacttacaattgacccaataatttgatcaacggaaca	12968	0	0	0	0	13	18	28	86	69	39	0	56	0	21	13	0	0	0	0	0	0	34	0	521	406	30	0	59	0	11	0	0	0	0	0	10	0	47	0	0	0	0	22	100	26
Crossarchus	71110	genus	gaacaaaacaacctccgagtgatttttaatctagacccacaggtcaaaagtattacatcacttattgatccaaaacacttgatcaacggaaca	1731	0	0	0	0	0	0	0	0	0	0	0	0	0	0	0	0	0	0	0	0	0	0	0	0	0	0	0	0	0	0	0	0	0	0	0	0	0	0	0	0	0	0	0	0	0
Genetta	94189	genus	gtacaaaacaacctccgaacgatttaaatcaagacttaccagtcaaaagtactacatcacttattgatccaaaaacatttgatcaacggagta	19	0	0	0	0	0	0	0	0	0	0	0	0	0	0	0	0	0	0	0	0	0	0	0	0	0	0	0	0	0	0	0	0	0	0	0	0	0	0	0	0	0	0	0	0	0
Bos	9903	genus	gaacagaaaatcctctgagggattttaaagactagacccacaagtcaaatcaaaccatcgcttattgatccaaaaatttgatcaacagaaca	15	0	0	0	0	0	0	0	0	0	0	0	0	0	0	0	0	0	0	0	0	0	0	0	0	0	0	0	0	0	0	0	0	0	0	0	0	0	0	0	0	0	0	0	0	0
Philantomba	907740	genus	gaataaaaaatcctccgagcgattttaaagactagacccacaagtcaaatcaaattatcgcttattgatycaaaaactagatcaacgraaca	15	0	0	0	0	0	0	0	0	0	0	0	0	0	15	0	0	0	0	0	0	0	0	0	0	0	0	0	0	0	0	0	0	0	0	0	0	0	0	0	0	0	0	0	0	0
Cercocebus	9529	genus	gcacagctaaacctccgaataatccatgctaagactatacaagtcaaagcgaactaatatttataactgatccaacaacttgatcaacggaaca	15	0	0	0	0	0	0	0	0	0	0	0	0	0	0	0	0	0	0	0	0	0	0	0	0	0	0	0	0	0	0	0	0	0	0	0	0	0	0	0	0	0	0	0	0	0
Caprinae	9963	subfamily	gaacaaaaaatcctctgagtgattttaaagactagacccacaagtcaaatcacactgtcaattattgatcccaaaatttgatcaacggaaca	47908	488	0	5340	482	0	484	0	0	0	0	0	0	0	0	0	0	0	442	777	3233	0	0	23	0	0	0	0	0	967	18	0	0	0	65	0	328	0	0	0	0	392	0	0	0	361
Cercopithecinae	9528	subfamily	gcacaactaaacctccgaataatccatgctaagactatacaagtcaaagcgaactaatatttataactgatccaacaacttgatcaacggaaca	44857	0	10380	0	0	0	0	0	0	0	0	0	0	0	0	0	190	83	0	0	0	618	0	0	0	0	46	0	0	0	0	0	1246	0	0	0	0	525	0	57	0	0	0	0	0	194
Homininae	207598	subfamily	gcataattaaacctccgagcaacctatgctaagactaaacaagtttaagcgaattactatacatatattgacccaataatttgatcaacggaaca	361	0	0	0	0	0	0	0	0	0	0	0	0	0	0	0	0	0	0	0	0	0	0	0	0	0	0	0	0	0	0	0	0	13	0	0	0	0	0	0	0	0	0	0	0	0
Cephalophinae	9952	subfamily	ggataaaaaatcctctgagcgattttaaagactagacccacaagtcaaatcaaattatcgcttattgatccaaaaacttgatcaacggaaca	272	0	0	0	0	0	0	0	0	0	0	0	0	0	0	0	0	0	0	0	0	0	0	0	0	0	0	0	0	0	0	0	0	0	0	0	0	0	0	0	0	0	0	0	0	0
Hominidae	9604	family	gcacaacccaacctccgagcaatacatgctaagacctcaccagtcaaagcgaattactacatccaattgatccaatgacttgaccaacggaaca	295	0	0	0	0	0	0	0	0	0	0	0	0	0	0	0	0	0	0	0	0	0	0	0	0	0	0	0	0	0	0	0	0	0	0	0	0	0	0	0	0	0	0	0	0	0
Bovidae	9895	family	gaacaaaaaatcctctgagagattttaaagactagacccacaagtcaaatcacactattgcttattgatccaaaaatttgatcaacggaaca	14	0	0	0	0	0	0	0	0	0	0	0	0	0	0	0	0	0	0	0	0	0	0	0	0	0	0	0	0	0	0	0	0	0	0	0	0	0	0	0	0	0	0	0	0	0
Pecora	35500	infraorder	gaacaaaaaatcctctgagtgattttaaagactagacccacaagtcaaatcacactgtcaattattgatcccaaaatttgatcaacgaaaca	75988	11491	798	1845	184	65	132	117	659	45	0	0	0	0	0	0	12	293	148	281	1090	78	310	218	250	2871	1302	22	0	379	428	0	0	0	17	0	105	0	0	16	0	106	29	0	138	112
Primates	9443	order	gcataactaaacctccgaataacctatgctaagactacacaagccaaagcgagccaacacctataattgatccaataacttgaccaacagagca	1520	0	0	0	0	0	0	0	0	0	0	0	15	0	0	205	0	0	0	0	0	0	0	0	0	0	0	0	0	0	0	0	0	0	0	0	85	0	0	0	0	0	0	0	0	0
Euteleostomi	117571	clade	gcagaacccaacctccgagcagtacatgctaagacttcaccagtcaaagcgaactactatactcaattgatccaataacttgaccaacggaaca	11535	0	0	0	0	0	0	0	0	0	0	0	0	0	0	0	0	0	0	0	0	0	0	0	0	0	0	0	0	0	0	0	0	0	0	0	0	0	0	0	0	0	0	0	0	0
Boreoeutheria	1437010	clade	gtacaaaaaaccctccgagtgattttaatctagacaaaccagtcaaaataaccataacatcacttattgatccaaaattttgatcaacggaaca	1093	0	0	0	0	0	0	0	0	0	0	0	0	0	0	0	0	0	0	0	0	0	0	0	0	0	0	0	0	0	0	0	0	0	0	0	0	0	0	0	0	0	0	0	0	0
Amniota	32524	clade	gaataaaaaatcctccgagcgattttaaagactagacctacaagtcaaatcaaactatcgtttattgatccaaaaatttgatcaacagaaca	791	0	0	0	0	17	0	0	0	0	0	0	0	0	0	0	0	0	0	0	0	0	0	19	0	0	0	0	0	0	0	0	0	0	0	0	0	0	0	0	0	0	0	17	0	0
unclassified Cricetomys	2638341	no rank	gcacaaaaaaccctccgaatgtttctaaccaagaccaacaagtctaagtaactaaaaacatatttgacccaaatatatttgatcaacggacca	1838	0	0	0	0	0	0	0	0	0	0	0	0	0	0	0	0	0	0	0	0	0	0	0	1838	0	0	0	0	0	0	0	0	0	0	0	0	0	0	0	0	0	0	0	0	0
[truncated: 195 more columns]

## Sheet: removed
Pan troglodytes	50886
Macaca fascicularis	24627	17037
Philantomba Maxwelii	200s
Cephalophus jentinki	20
Sus scrofa	14
Hilsa keele	12
Gorilla gorilla	13528
Bos	1108
Caprinae	47908
Homo sapien	700	11535
Cephalophiane	272
Bovidae	14
Cephalophus dorsalis	791
Primates	1520
Pecora	75988
